# Supplementary material for: Reaction of Chalcones with Cellular Thiols. The Effect of the 4-Substitution of Chalcones and Protonation State of the Thiols on the Addition Process. Diastereoselective Thiol Addition
Source: MDPI journal article supplement (doi:10.3390/molecules26144332), 2021-07-17

## Supplementary materials

**Figure S1.** Change in the chromatographic peak area of Adduct-1 of chalcones **1** and **2** in the chalcone-GSH incubations of pH 8.0/8.5.

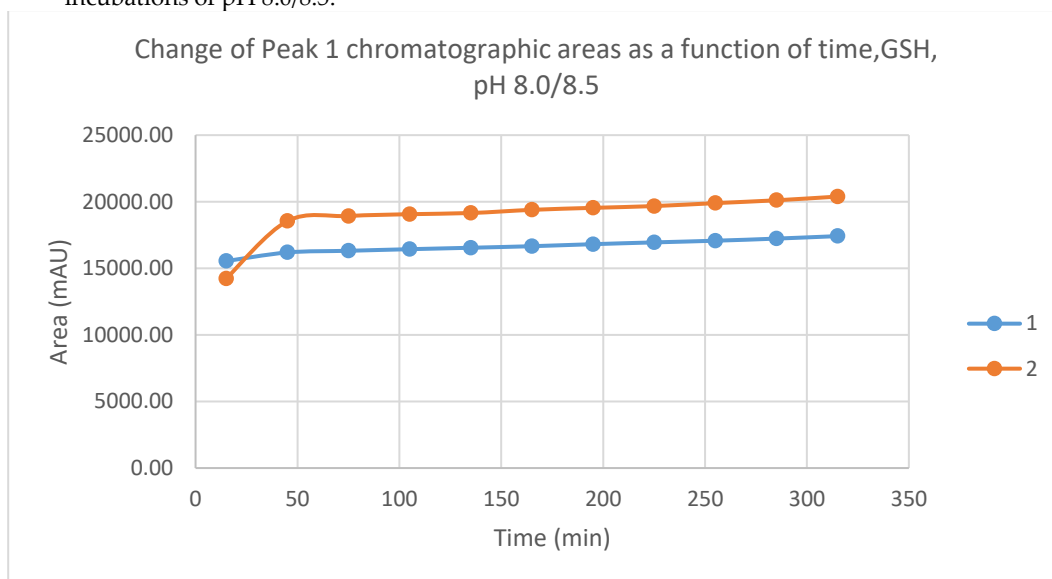

**Figure S2.** Change in the chromatographic peak area of Adduct-1 of chalcones **1** and **2** in the chalcone-GSH incubations of pH 6.3/6.8.

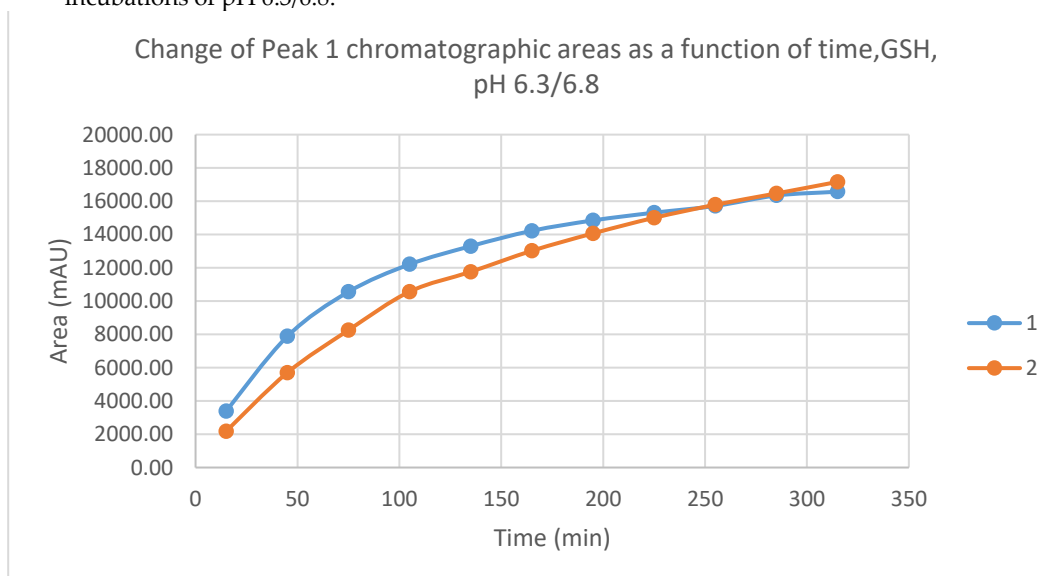

**Figure S3.** Change in the chromatographic peak area of Adduct-1 of chalcones **1** and **2** in the chalcone-NAC incubations of pH 6.3/6.8.

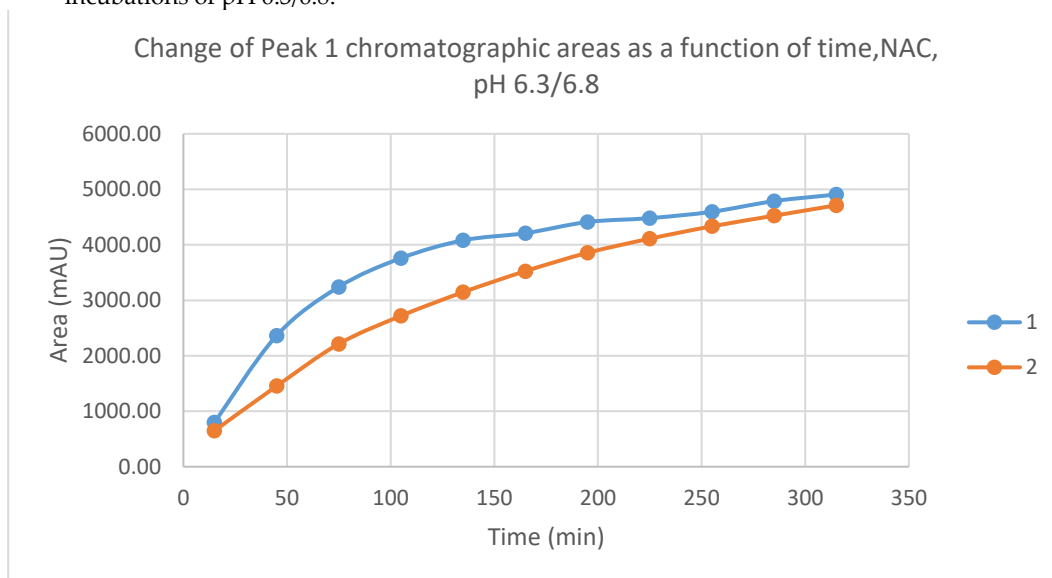

**Figure S4.** Change in the chromatographic peak area of Adduct-2 of chalcones **1** and **2** in the chalcone-NAC incubations of pH 6.3/6.8.

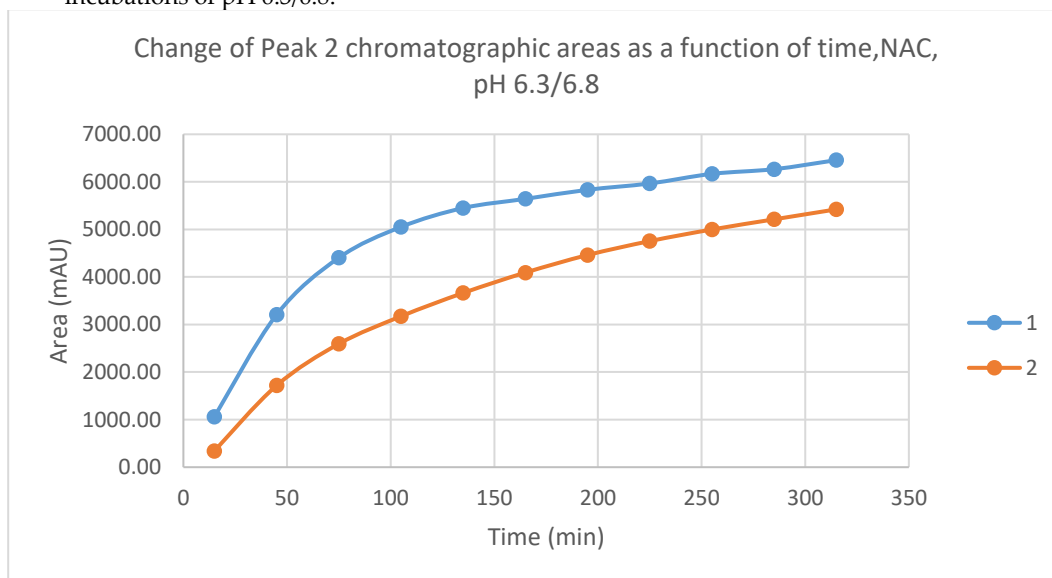

**Figure S5.** Change in the chromatographic peak area of chalcones **1** and **2** in the chalcone-GSH incubations of pH 3.2/3.7.

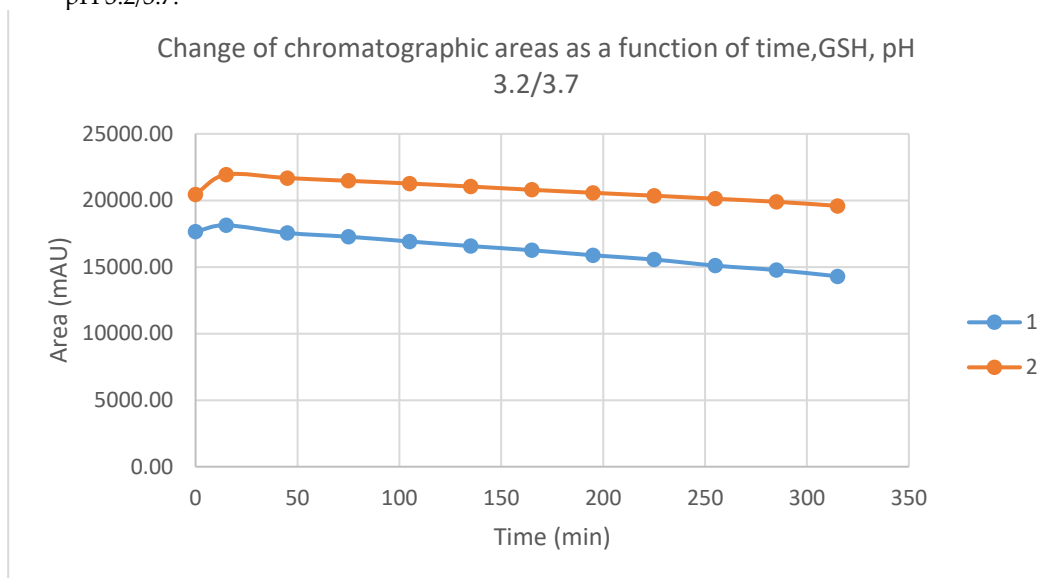

**Figure S6.** Change in the chromatographic peak area of chalcones **1** and **2** in the chalcone-NAC incubations of pH 3.2/3.7.

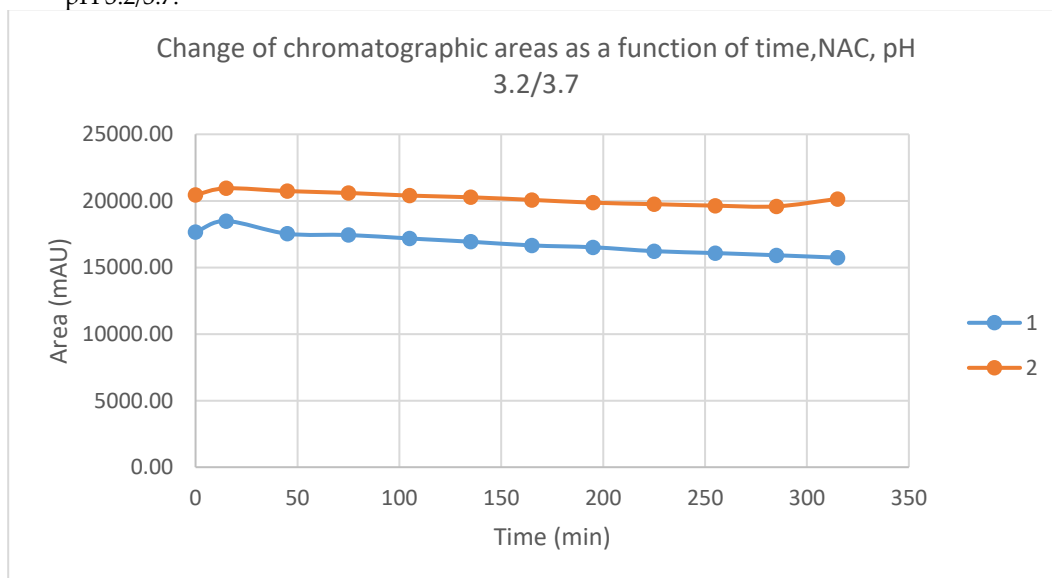

**Figure S7.** Change in the chromatographic peak area of Adduct-1 of chalcones **1** and **2** in the chalcone-GSH incubations of pH 3.2/3.7.

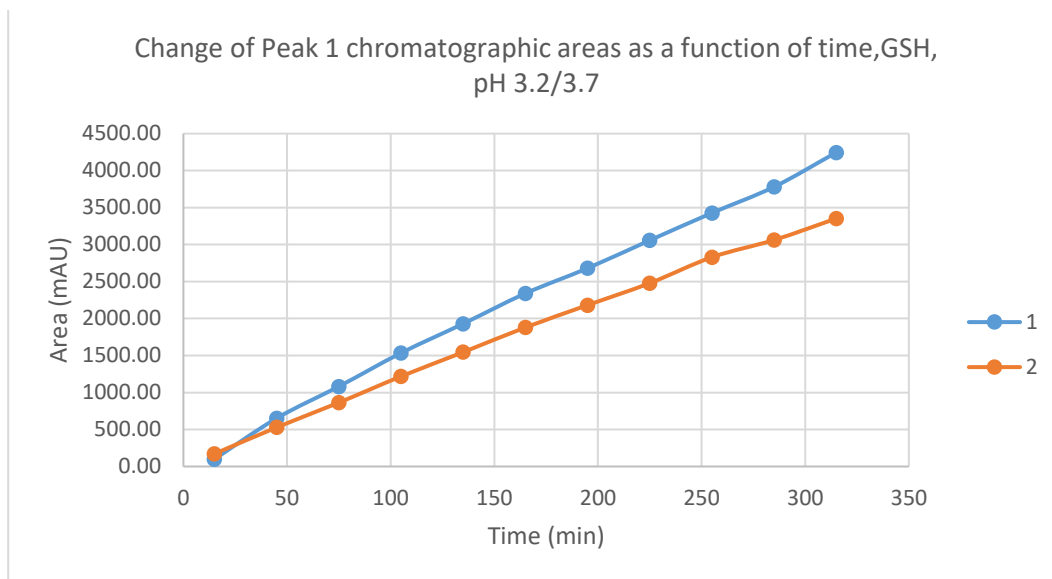

**Figure S8.** Change in the chromatographic peak area of Adduct-1 of chalcones **1** and **2** in the chalcone-NAC incubations of pH 3.2/3.7.

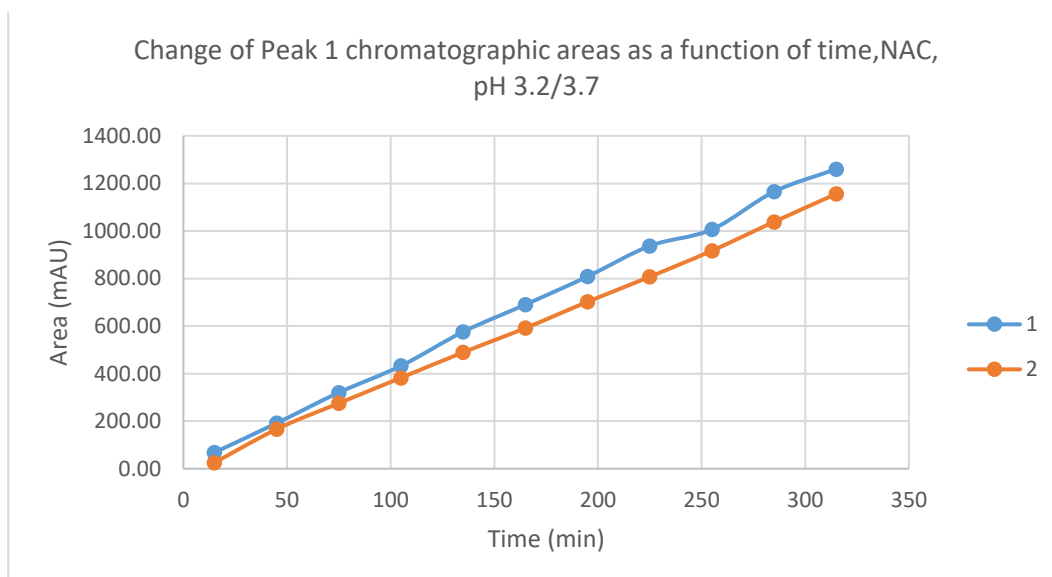

**Figure S9.** Change in the chromatographic peak area of Adduct-2 of chalcones **1** and **2** in the chalcone-NAC incubations of pH 3.2/3.

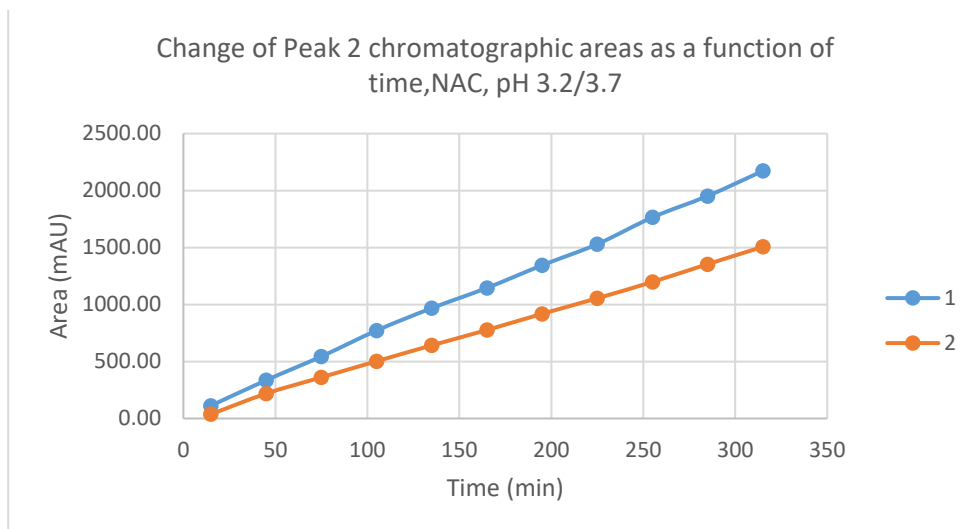

**Table S1.** Mass spectrometry data

| Type                | Value                            | 1                                                               | 2                                                               |
|---------------------|----------------------------------|-----------------------------------------------------------------|-----------------------------------------------------------------|
| Chalcone            | Formula                          | C <sub>16</sub> H <sub>14</sub> O                               | C <sub>16</sub> H <sub>14</sub> O <sub>2</sub>                  |
|                     | [M+H] <sup>+</sup> <sub>th</sub> | 223.1123                                                        | 239.1072                                                        |
|                     | [M+H] <sup>+</sup> <sub>m</sub>  | 223.1117                                                        | 239.1066                                                        |
|                     | ΔM                               | -2.69                                                           | -2.51                                                           |
| Chalcone-GSH adduct | Formula                          | C <sub>26</sub> H <sub>31</sub> N <sub>3</sub> O <sub>7</sub> S | C <sub>26</sub> H <sub>31</sub> N <sub>3</sub> O <sub>8</sub> S |
|                     | [M+H] <sup>+</sup> <sub>th</sub> | 530.1961                                                        | 546.1910                                                        |
|                     | [M+H] <sup>+</sup> <sub>m</sub>  | 530.1946                                                        | 546.1892                                                        |
|                     | ΔM                               | -2.83                                                           | -3.30                                                           |
|                     | Number of isomers                | 1                                                               | 1                                                               |
| Chalcone-NAC adduct | Formula                          | C <sub>21</sub> H <sub>23</sub> NO <sub>4</sub> S               | C <sub>21</sub> H <sub>23</sub> NO <sub>5</sub> S               |
|                     | [M-H] <sup>-</sup> <sub>th</sub> | 384.1270                                                        | 400.1219                                                        |
|                     | [M-H] <sup>-</sup> <sub>m</sub>  | 384.1246                                                        | 400.1191                                                        |
|                     | ΔM                               | -6.25                                                           | -7.00                                                           |
|                     | Number of isomers                | 2                                                               | 2                                                               |

**Figure S10.** High resolution, positive mode HESI MS spectrum of chalcone 1.

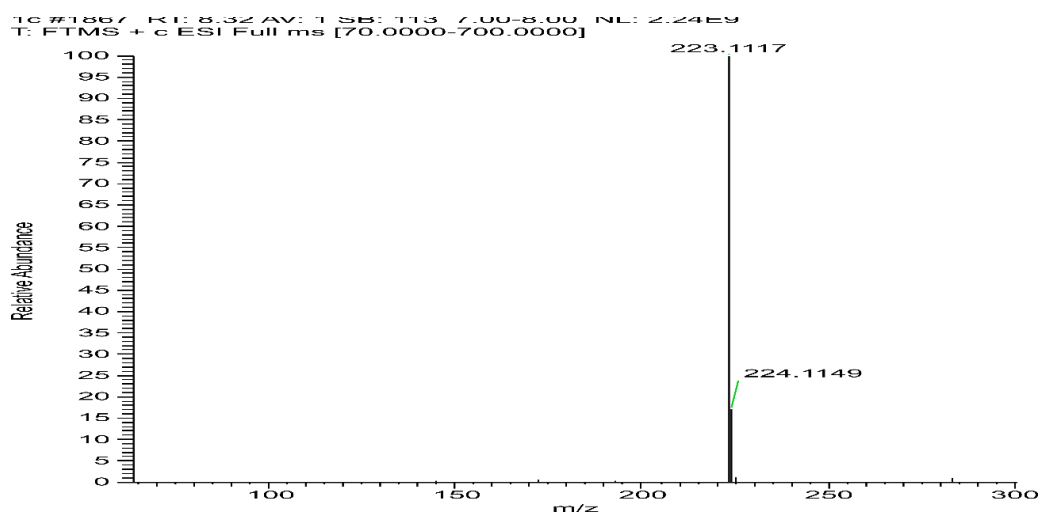

**Figure S11.** High resolution, positive mode HESI MS spectrum of chalcone 2.

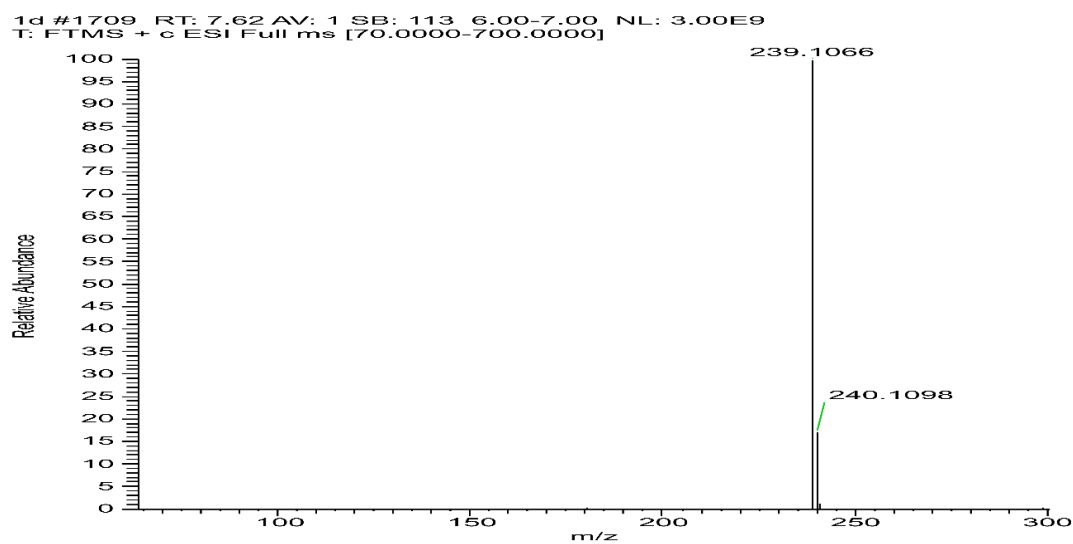

**Figure S12.** High resolution, positive mode HESI MS spectrum of chalcone 1-GSH conjugate.

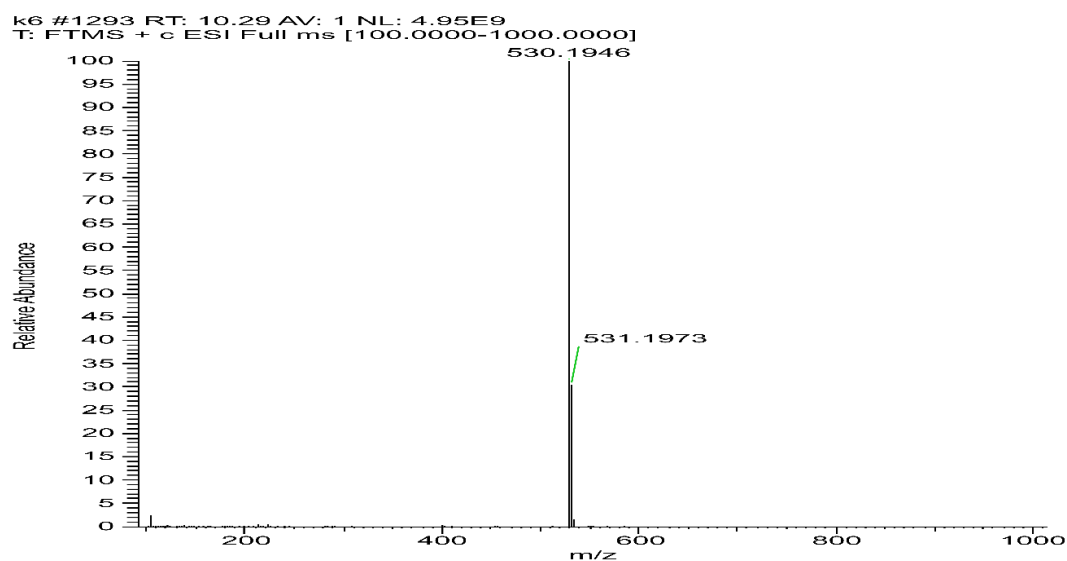

**Figure S13.** High resolution, negative mode HESI MS spectrum of chalcone 1-NAC conjugate.

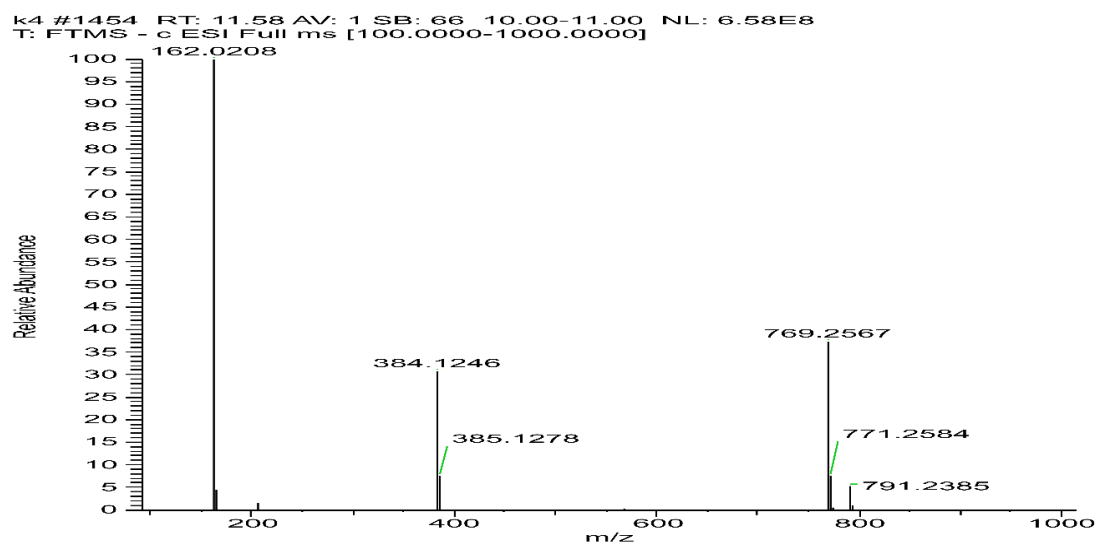

**Figure S14.** High resolution, positive mode HESI MS spectrum of chalcone 2-GSH conjugate.

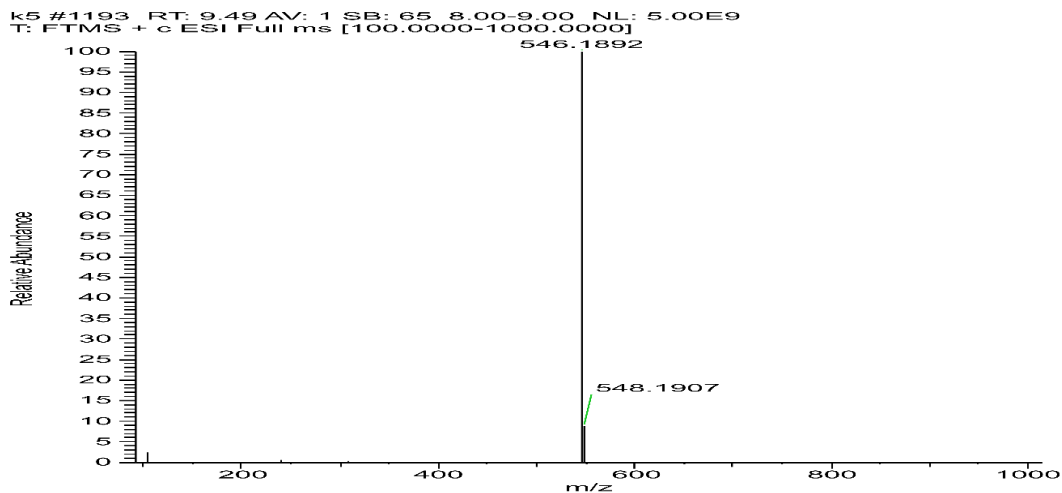

**Figure S15.** High resolution, negative mode HESI MS spectrum of chalcone 2-NAC conjugate.

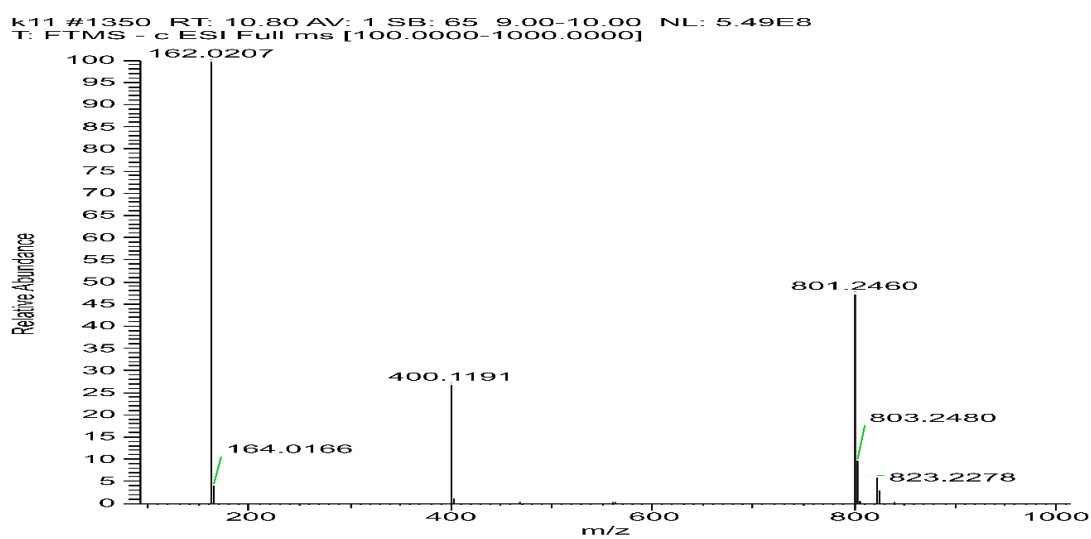

**Figure S16.** HPLC-UV-Vis spectrum of (*E*)( $t_r$  16.354 min)/(*Z*)( $t_r$  16.128 min) isomeric mixture of chalcone 1.

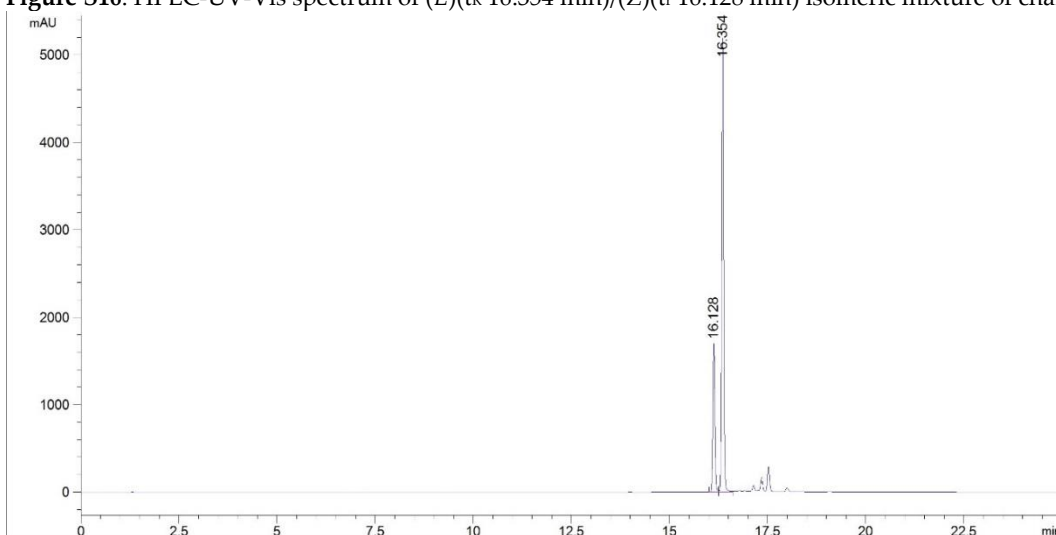

**Figure S17.** HPLC-UV-Vis spectrum of (*E*)( $t_r$  15.607 min)/(*Z*)( $t_r$  15.855 min) isomeric mixture of chalcone 2.

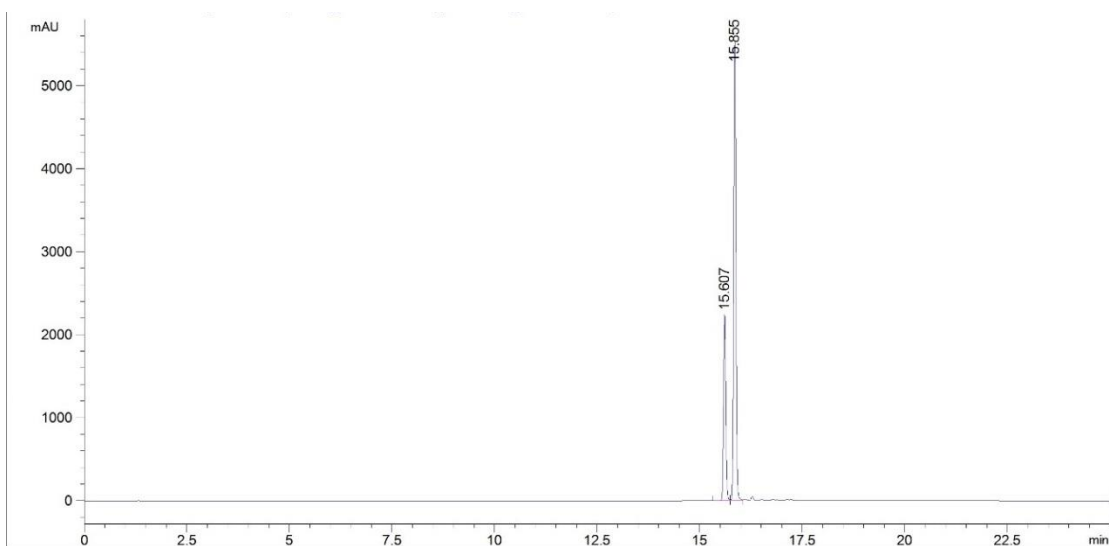



**Figure S18.** HPLC-UV-Vis chromatogram of pH 8.0/8.5 incubation (315-minute timepoint) of chalcone **1** and NAC.

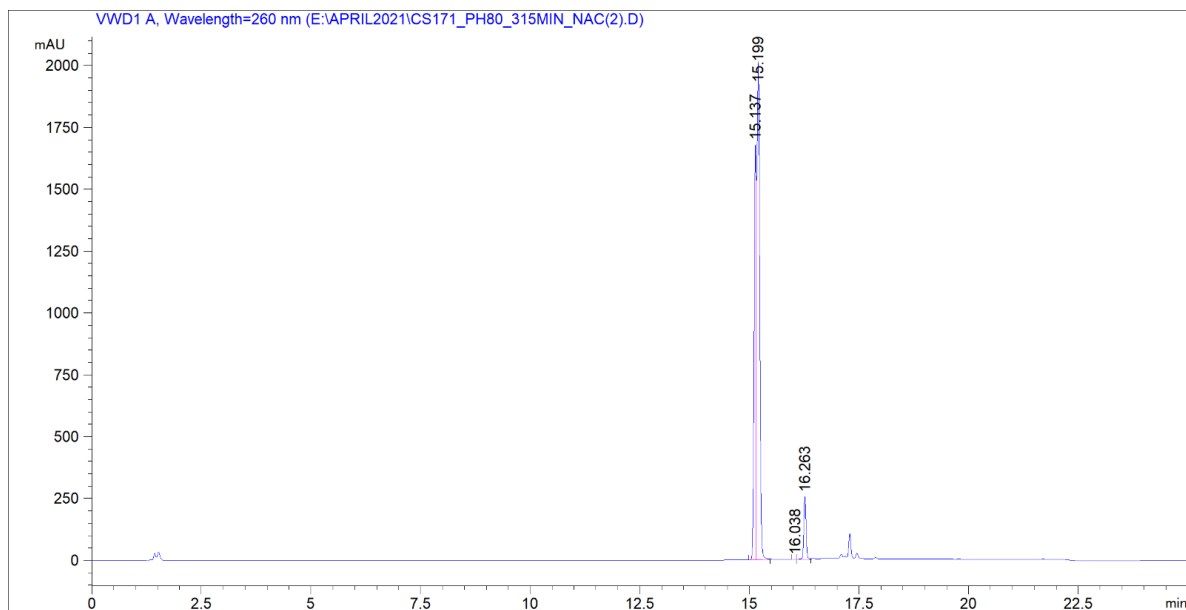

**Figure S19.** HPLC-UV-Vis chromatogram of pH 6.3/6.8 incubation (315-minute timepoint) of chalcone **1** and NAC.

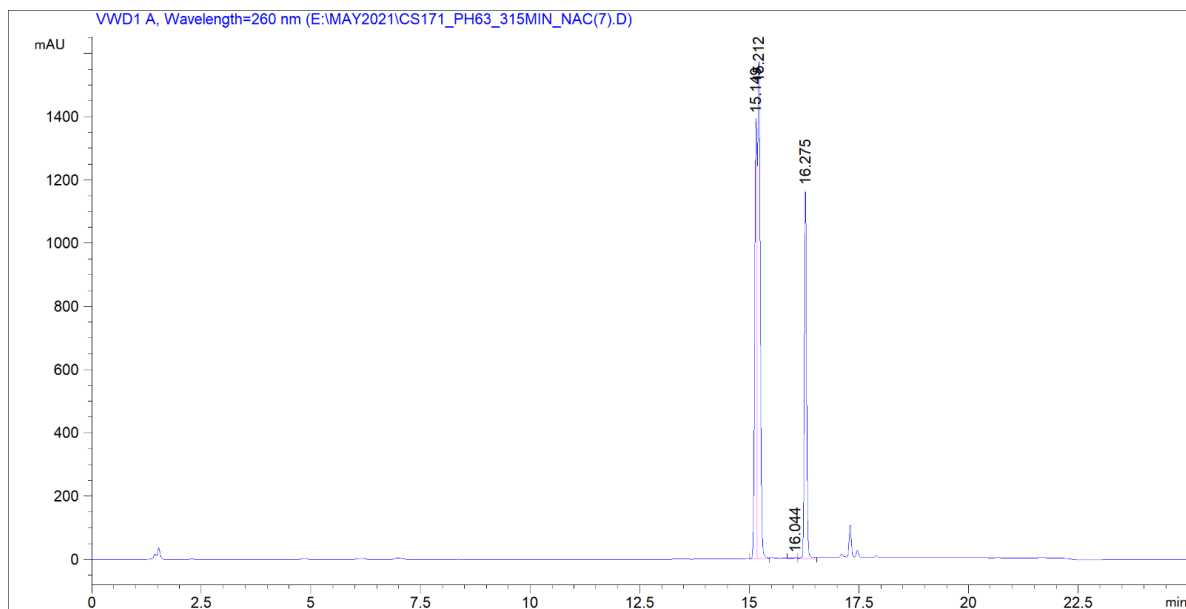

**Figure S20.** HPLC-UV-Vis chromatogram of pH 3.2/3.7 incubation (315-minute timepoint) of chalcone **1** and NAC.

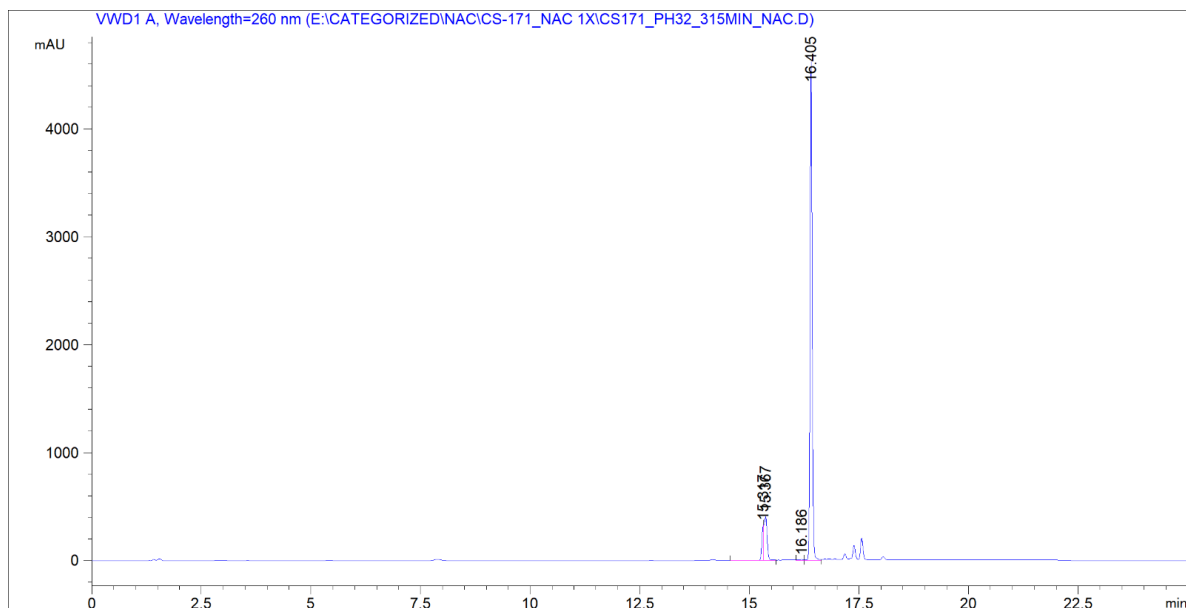

**Figure S21.** HPLC-UV-Vis chromatogram of pH 8.0/8.5 incubation (315-minute timepoint) of chalcone **2** and NAC.

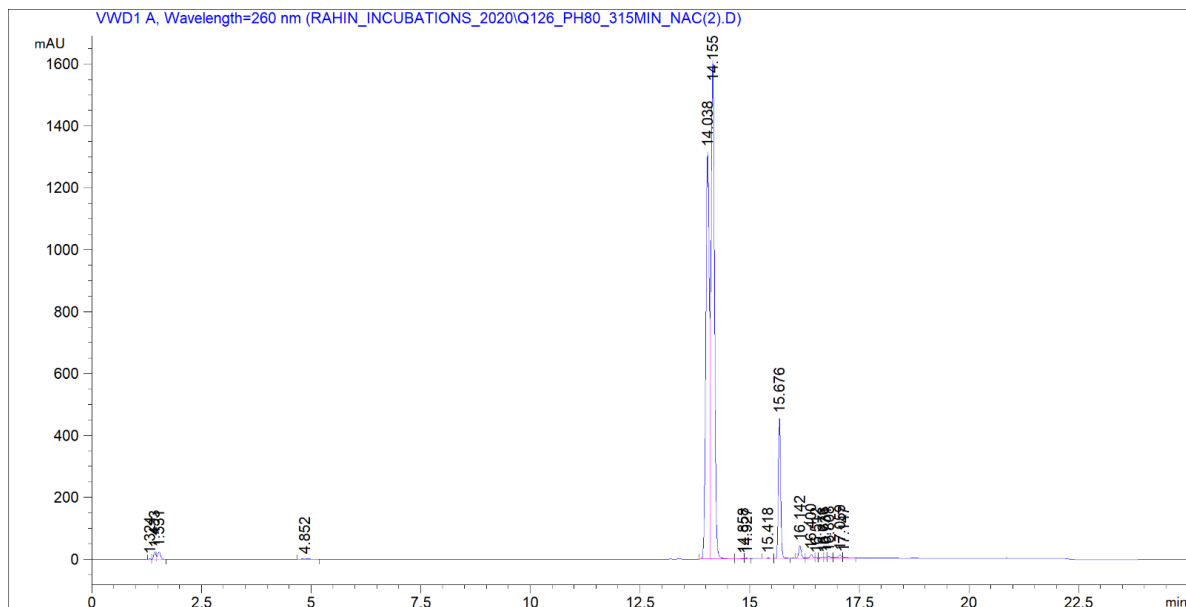

**Figure S22.** HPLC-UV-Vis chromatogram of pH 6.3/6.8 incubation (315-minute timepoint) of chalcone **2** and NAC.

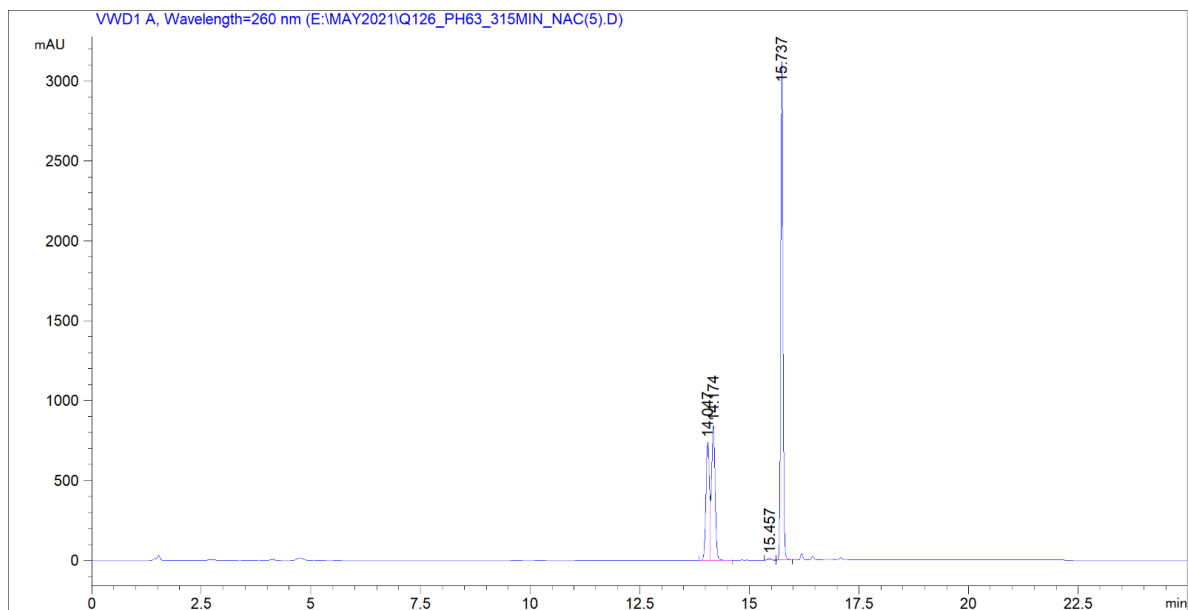

**Figure S23.** HPLC-UV-Vis chromatogram of pH 3.2/3.7 incubation (315-minute timepoint) of chalcone **2** and NAC..

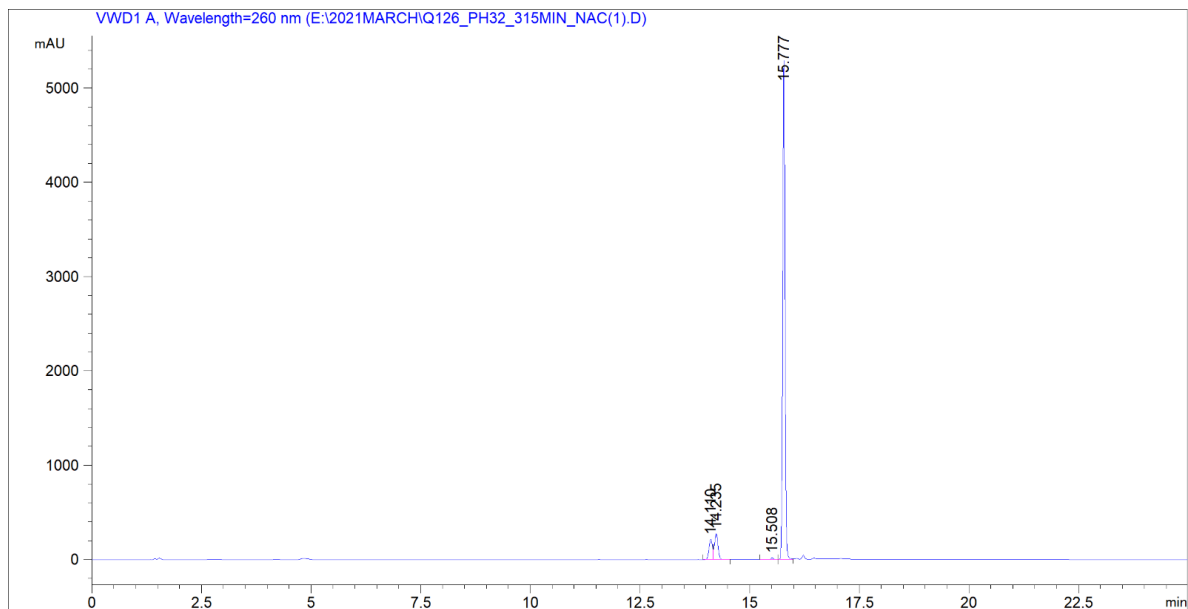

Supplement: s1 [file s1]
